# Supplementary material for: Black phosphorene as a hole extraction layer boosting solar water splitting of oxygen evolution catalysts
Source: PubMed Central journal article supplement (PMC6494903; doi:10.1038/s41467-019-10034-1), 2019-05-01
Supplement: 41467_2019_10034_MOESM1_ESM.pdf [file 41467_2019_10034_MOESM1_ESM.pdf]

# **Black Phosphorene as A Hole Extraction Layer Boosting Solar Water Splitting of Oxygen Evolution Catalysts**

Zhang et al

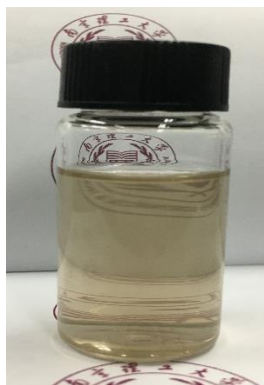

**Supplementary Figure 1.** BP nanosheets dispersed in isopropanol.

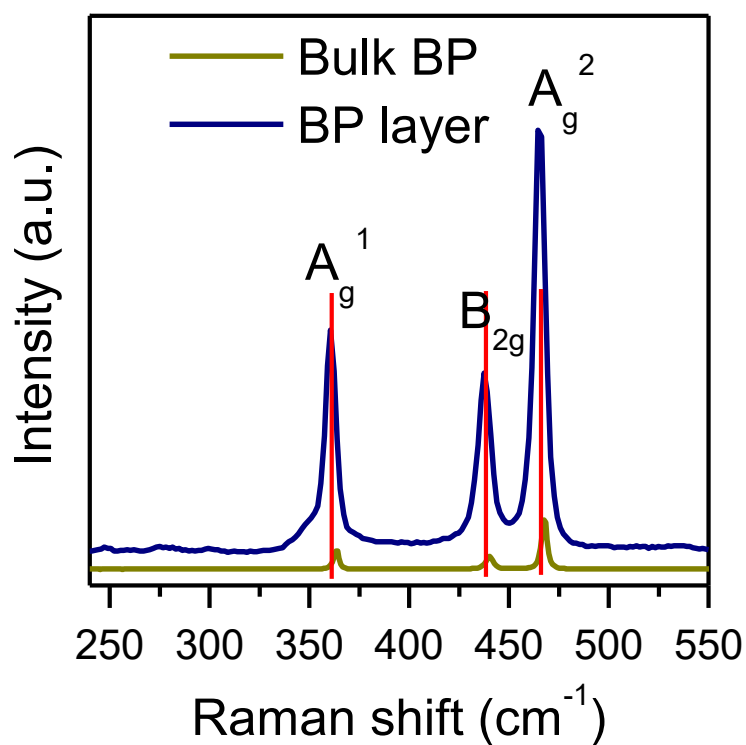

**Supplementary Figure 2.** Raman shifts of bulk BP and exfoliated BP layer.

Raman spectra of bulk BP and exfoliated BP sheets show three typical peaks between 300 and 500  $\text{cm}^{-1}$ , which include an out-of-plane vibrational mode of  $A_g^1$ , two in-plane modes of  $B_{2g}$  and  $A_g^2$  [1]. Compared to bulk BP, the Raman signals of exfoliated BP are shifted to a high number, which is in agreement with previous reports [2].

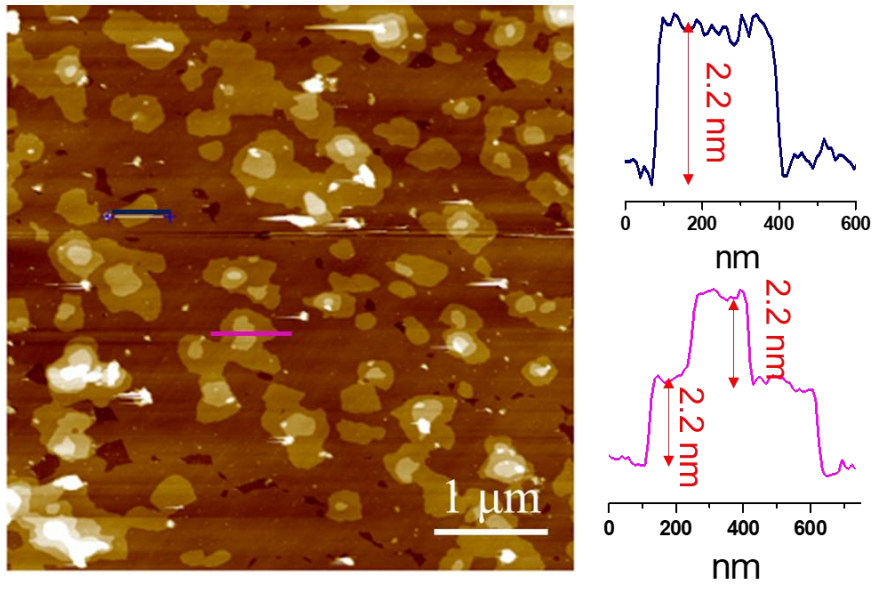

**Supplementary Figure 3.** AFM image of exfoliated BP layer.

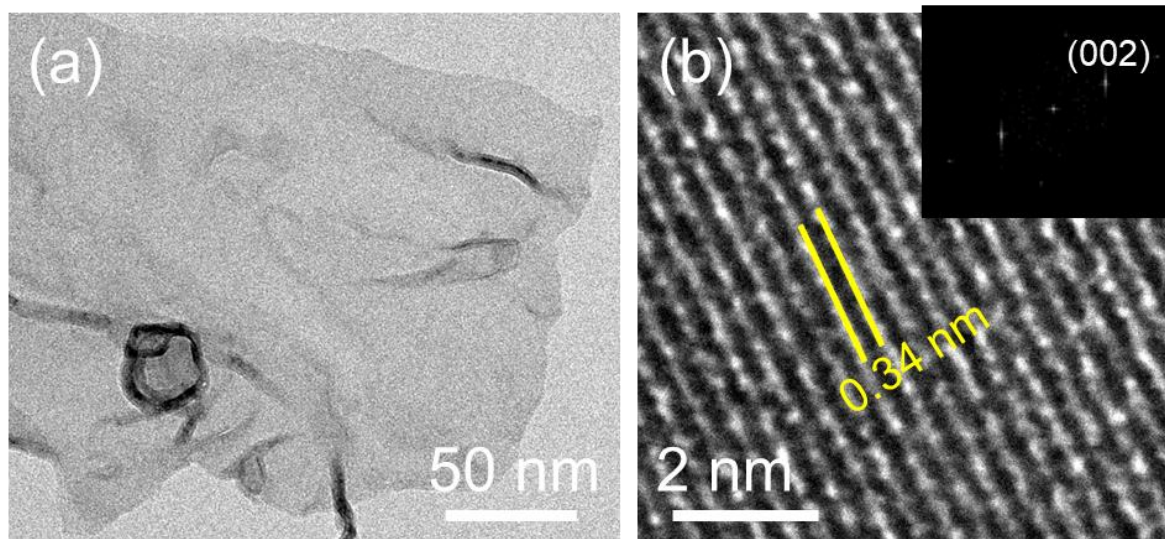

**Supplementary Figure 4.** TEM and HR-TEM images of exfoliated BP layer.

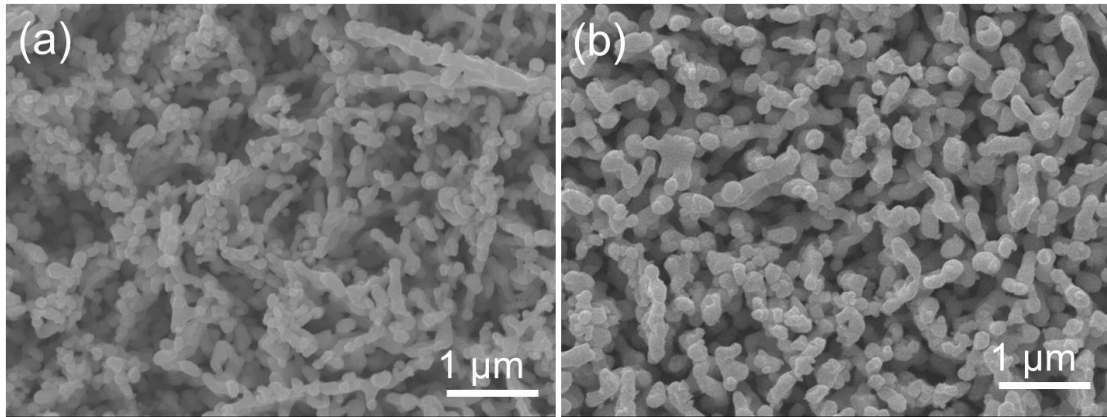

**Supplementary Figure 5.** SEM images of pure BiVO<sub>4</sub> and BP/BiVO<sub>4</sub> photoanodes.

The top-view SEM images indicate that the pure BiVO<sub>4</sub> photoanode has larger micropores than BP/BiVO<sub>4</sub>. The changes in the porous electrode can be considered as the collapse of the structure to some extent that arises from high centripetal force through centrifuged deposition.

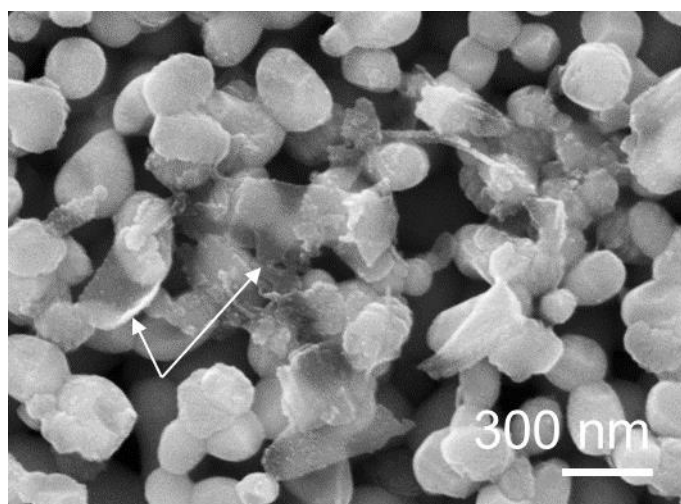

**Supplementary Figure 6.** SEM image of the depositing BP on BiVO<sub>4</sub> electrode by immersed BiVO<sub>4</sub> in BP dispersion.

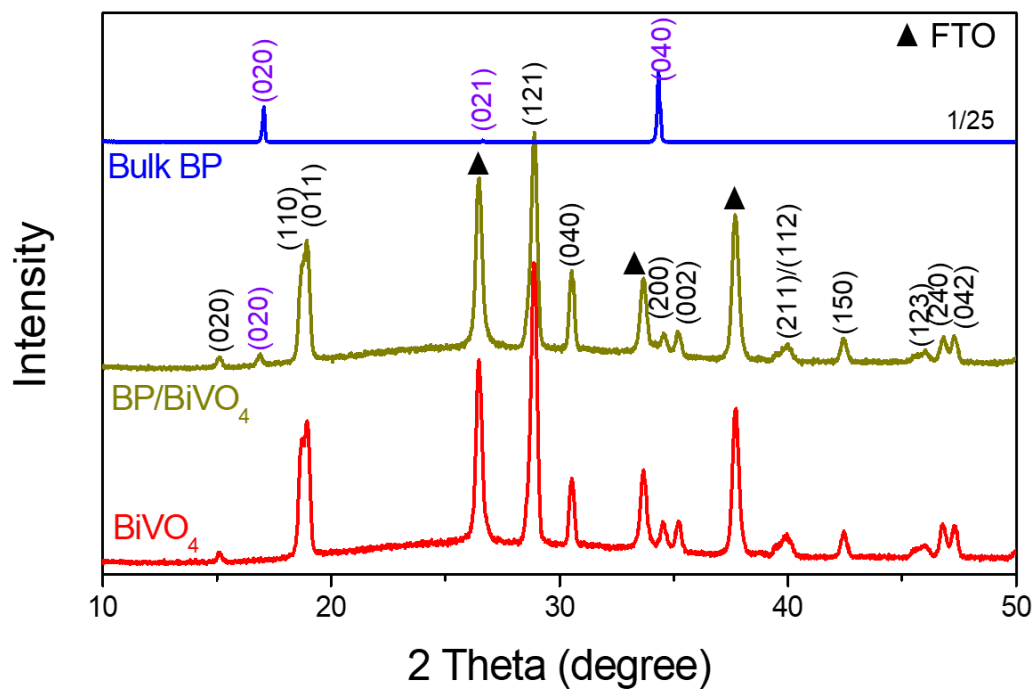

**Supplementary Figure 7.** XRD patterns of BiVO<sub>4</sub>, BP/BiVO<sub>4</sub>, and Bulk BP.

XRD pattern of BP/BiVO<sub>4</sub> clearly shows an additional peak corresponding to (002) plane of BP, as compared to that of pure BiVO<sub>4</sub>.



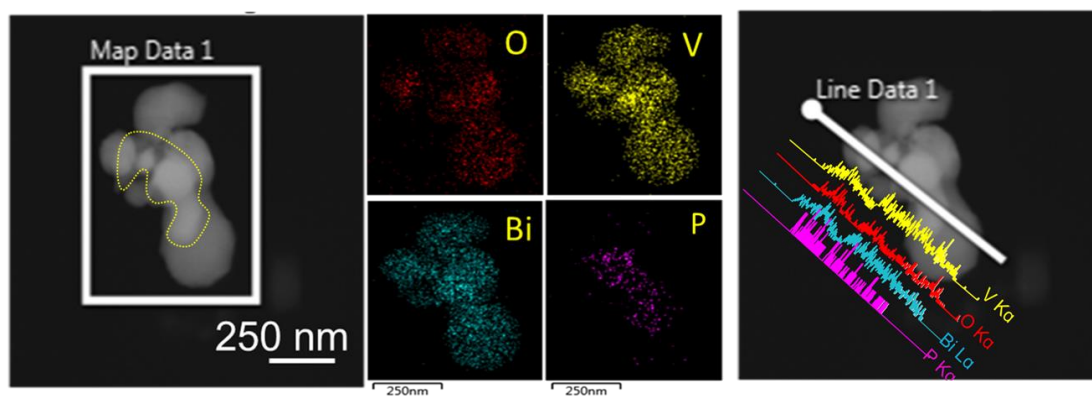

**Supplementary Figure 8.** HAADF-STEM-EDX image of BP/BiVO<sub>4</sub>.

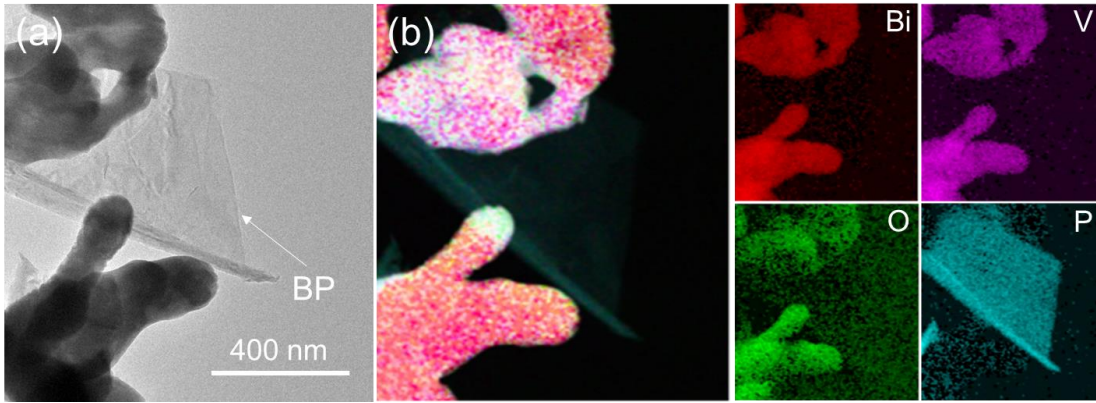

**Supplementary Figure 9.** TEM and HAADF-STEM-EDX element mapping images.

Figure S9 shows that the TEM and HAADF-STEM-EDX element mapping images of the depositing BP on  $\text{BiVO}_4$  electrode by immersed  $\text{BiVO}_4$  in BP dispersion.

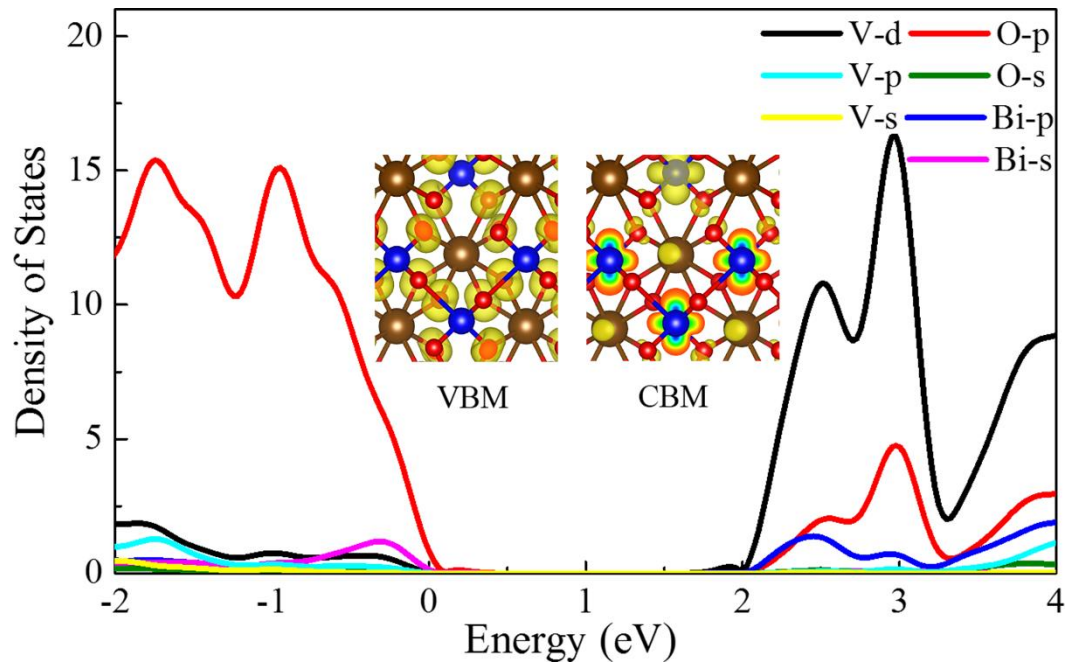

**Supplementary Figure 10.** Partial density of states and the corresponding charge density of valence band maximum and conduction band minimum of bulk BiVO<sub>4</sub>.

The theoretical results demonstrate that the valence band is mainly contributed by O-p orbital, together with a small contribution from Bi-s orbital mixing. The conduction band is primarily of V-d, O-p, and Bi-p with contributions from O-s orbital.

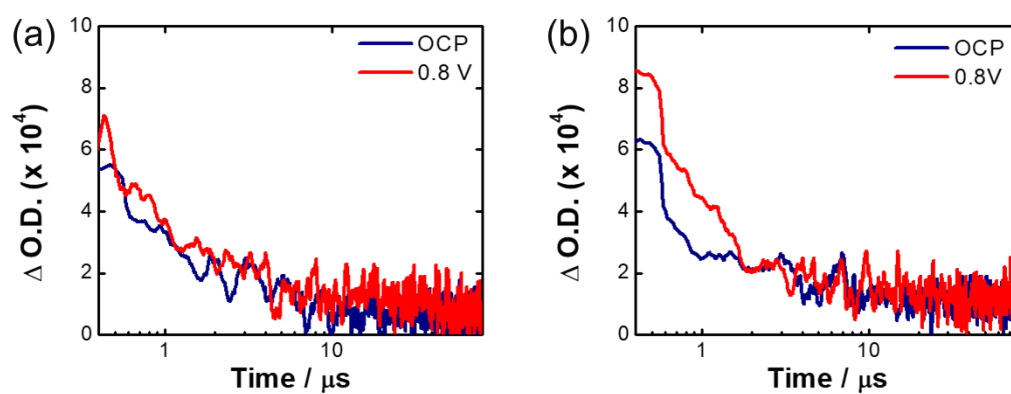

**Supplementary Figure 11.** In-situ transient absorption signals.

Figure 11a and 11b shows the in-situ transient absorption signals probed at 500 nm of BiVO<sub>4</sub> and BP/BiVO<sub>4</sub> photoanodes under OCP and 0.8 V vs Ag/AgCl bias, respectively.

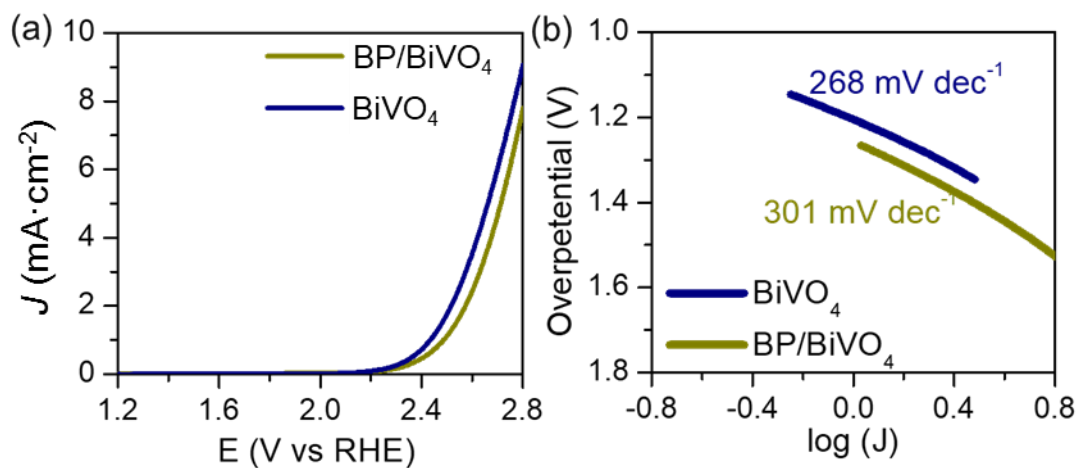

**Supplementary Figure 12.** The dark current density of BiVO<sub>4</sub> and BP/BiVO<sub>4</sub> with a scanning rate of 2 mV/s.

Figure S12a indicates that the OER activity of BiVO<sub>4</sub> is lowered after deposition of BP. In Figure S12b, the estimated Tafel slope for BiVO<sub>4</sub> photoanode (268 mV dec<sup>-1</sup>) is smaller than that for the BP/BiVO<sub>4</sub> photoanode (301 mV dec<sup>-1</sup>), implying that the BP somewhat hinders the reaction kinetics of BiVO<sub>4</sub>.

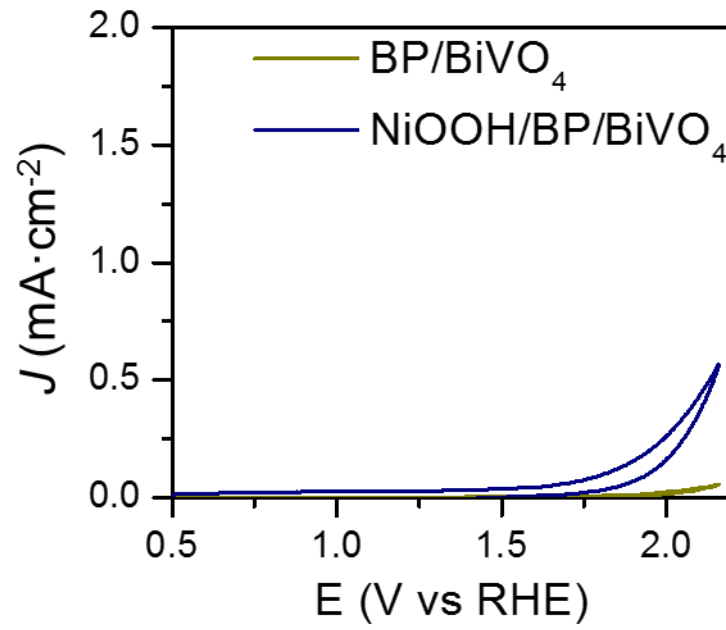

**Supplementary Figure 13.** CV curves of BP/BiVO<sub>4</sub> and NiOOH/BP/BiVO<sub>4</sub> with a scanning rate of 2 mV/s under dark condition.

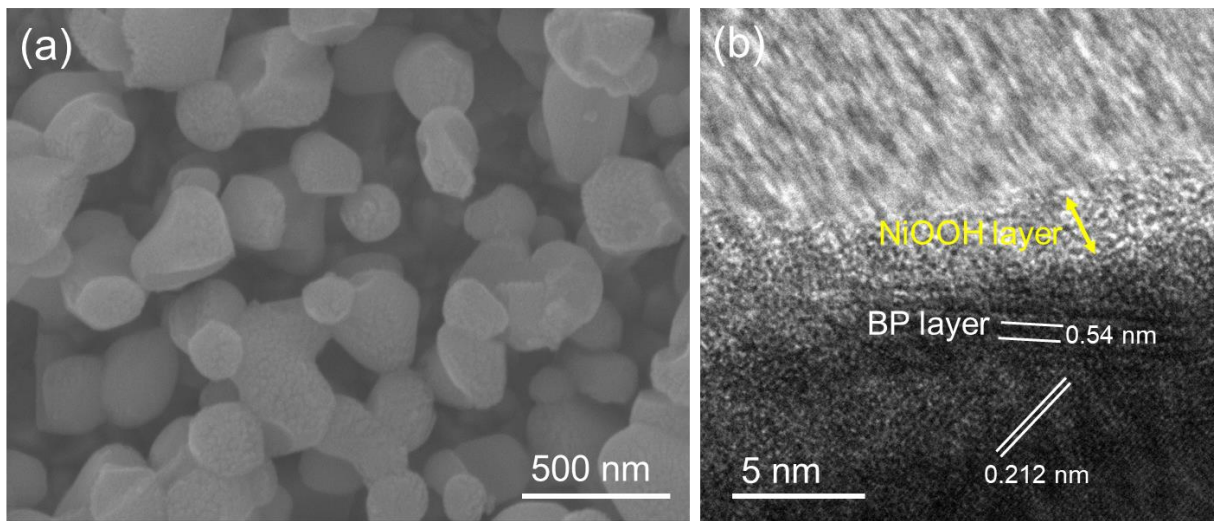

**Supplementary Figure 14.** SEM (a) and TEM (b) images of NiOOH/BP/BiVO<sub>4</sub> photoanode.

From the TEM image, it can be found that a 2 nm NiOOH layer is deposited on BP/BiVO<sub>4</sub> surface.

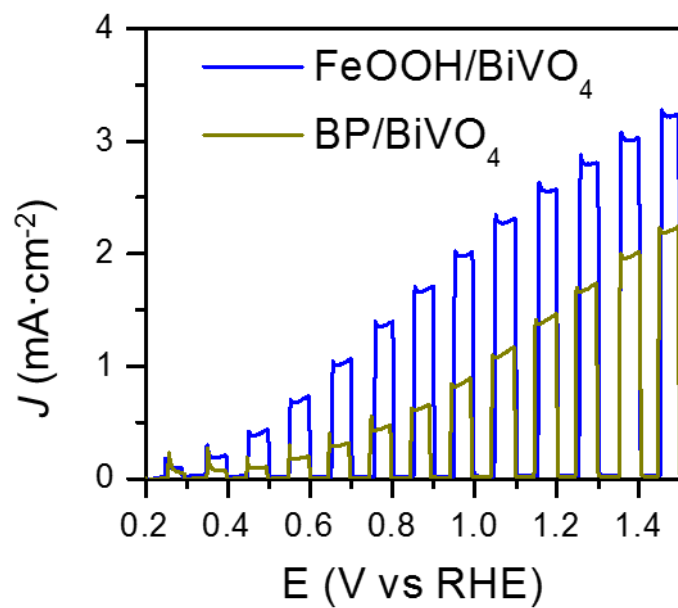

**Supplementary Figure 15.** Chopped  $J$ - $V$  curves of FeOOH/BiVO<sub>4</sub> and BP/BiVO<sub>4</sub> in KPi electrolyte under AM 1.5 illumination.



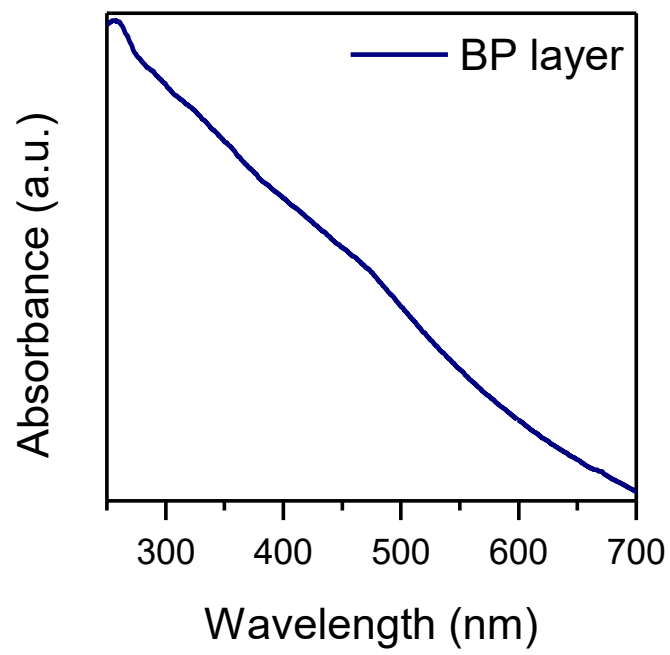

**Supplementary Figure 16.** UV-vis absorption spectrum of exfoliated BP layer.

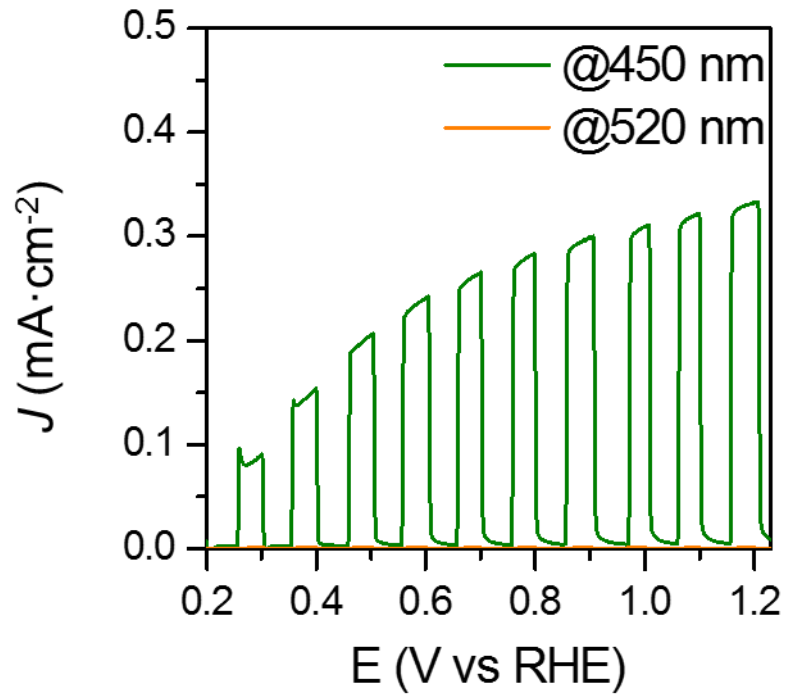

**Supplementary Figure 17.** Photocurrent response of BP/BiVO<sub>4</sub> photoanode in KPi electrolyte with hole scavenger (0.5M Na<sub>2</sub>SO<sub>3</sub>) under AM 1.5 with 450 nm and 520 nm band-pass filter.

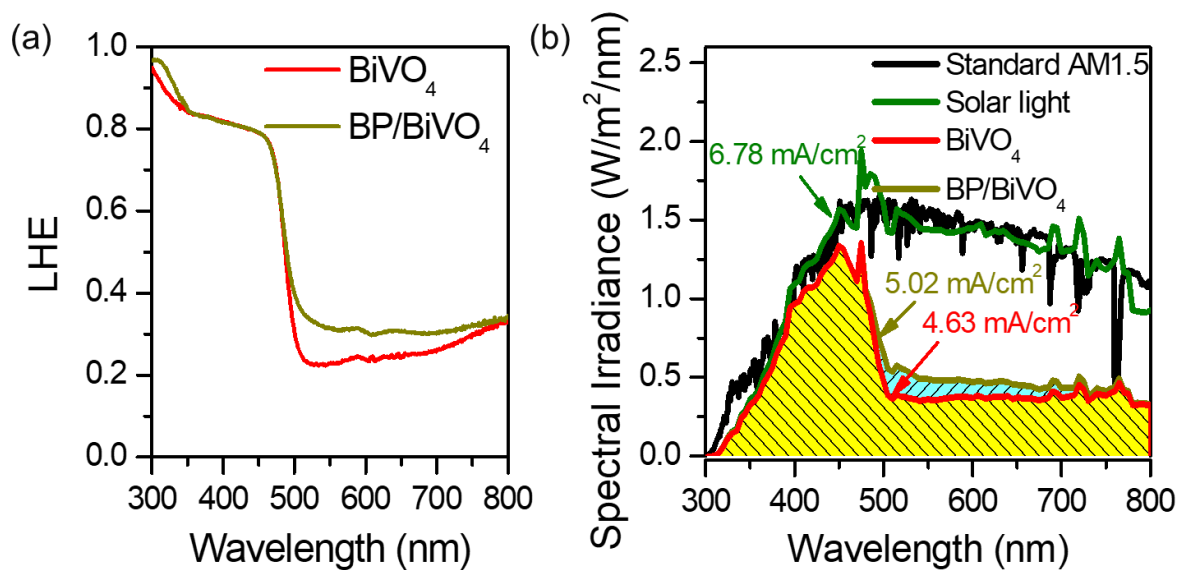

**Supplementary Figure 18.** (a) LHE of BiVO<sub>4</sub> and BP/BiVO<sub>4</sub> photoanodes, (b) Spectra of the solar irradiance of AM 1.5G and corresponding  $J_{\text{abs}}$  that was calculated by the LHE spectra of the BiVO<sub>4</sub> and BP/BiVO<sub>4</sub> photoanodes (300~515 nm).

Light harvesting efficiency (LHE) can be calculated by the following equation:

$$\text{LHE} = 1 - 10^{-A(\lambda)}$$

where  $A(\lambda)$  is absorbance,  $\lambda$  is wavelength.

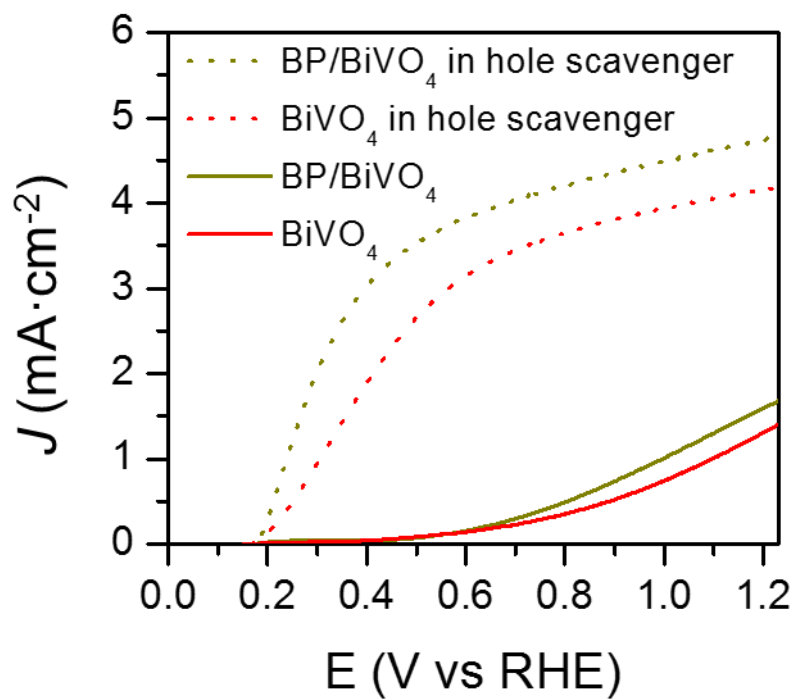

**Supplementary Figure 19.** J-V curves ( $J_{\text{HS}}$ ) of BiVO<sub>4</sub> and BP/BiVO<sub>4</sub> measured in KPi electrolyte with and without hole scavenger (0.5M Na<sub>2</sub>SO<sub>3</sub>).

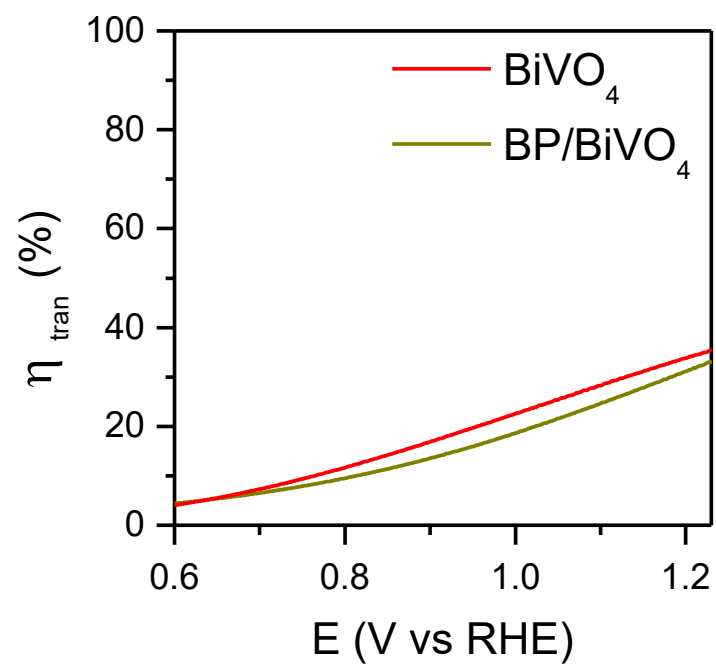

**Supplementary Figure 20.** Charge transfer efficiencies ( $\eta_{\text{tran}}$ ) of  $\text{BiVO}_4$  and  $\text{BP/BiVO}_4$  photoanodes.

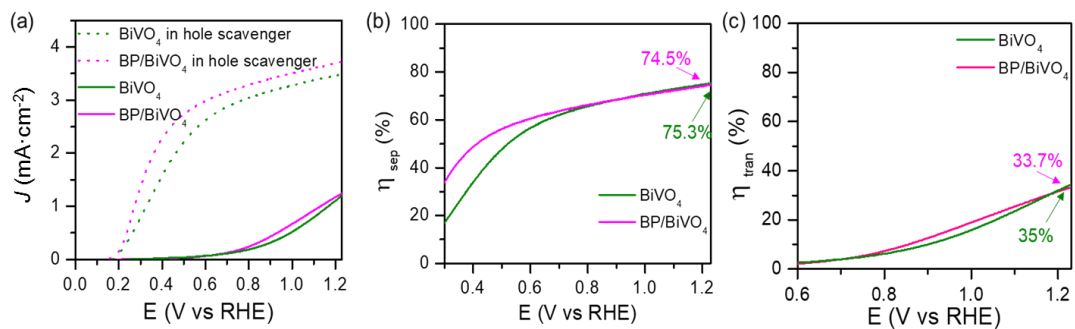

**Supplementary Figure 21.** (a) J-V curves of BiVO<sub>4</sub> and BP/BiVO<sub>4</sub> measured in KPi electrolyte with and without hole scavenger (0.5 M Na<sub>2</sub>SO<sub>3</sub>) under rear illumination. The corresponding charge separation efficiencies (b) and charge transfer efficiencies (c).

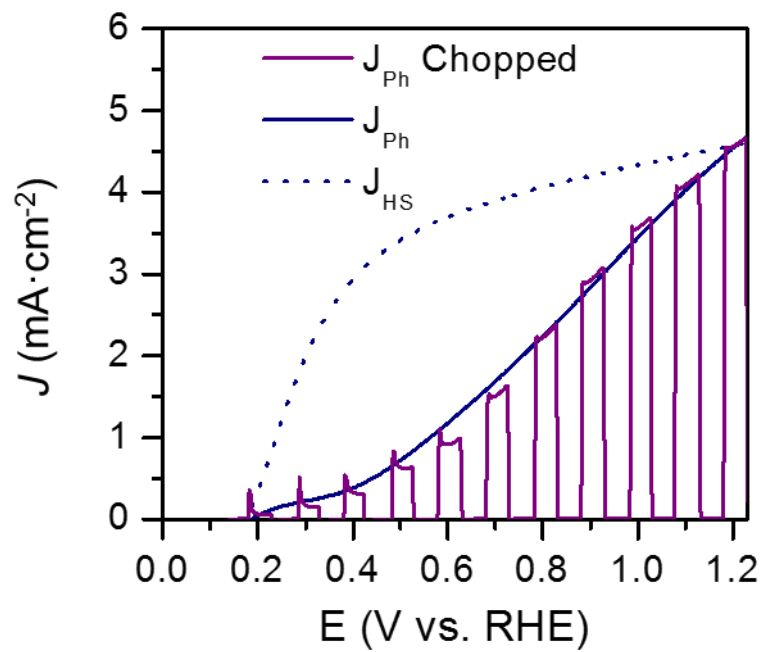

**Supplementary Figure 22.** J-V curves of the NiOOH/BP/BiVO<sub>4</sub> photoanodes measured in KPi electrolyte with and without hole scavenger (0.5 M Na<sub>2</sub>SO<sub>3</sub>).

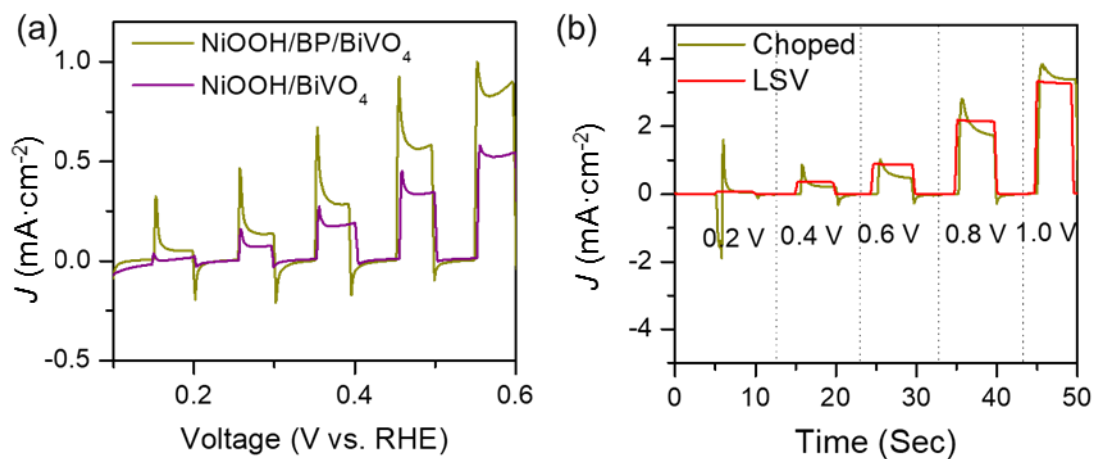

**Supplementary Figure 23.** (a) Chopped LSV measurements of NiOOH/BiVO<sub>4</sub> and NiOOH/BP/BiVO<sub>4</sub> photoanodes in potential ranging from 0.1 to 0.6 vs. RHE. (b) Comparison of transient-state photocurrent densities obtained by chronoamperometry (stable bias) and LSV (gradually increasing bias) in potential ranging from 0.2 to 1.0 V vs. RHE.



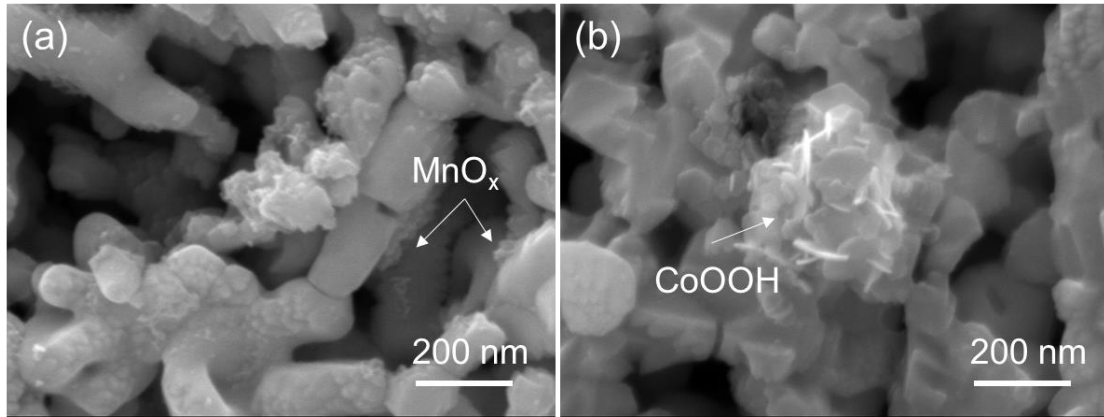

**Supplementary Figure 24.** SEM images of MnO<sub>x</sub>/BP/BiVO<sub>4</sub> (a) and CoOOH/BP/BiVO<sub>4</sub> (b) photoanodes.

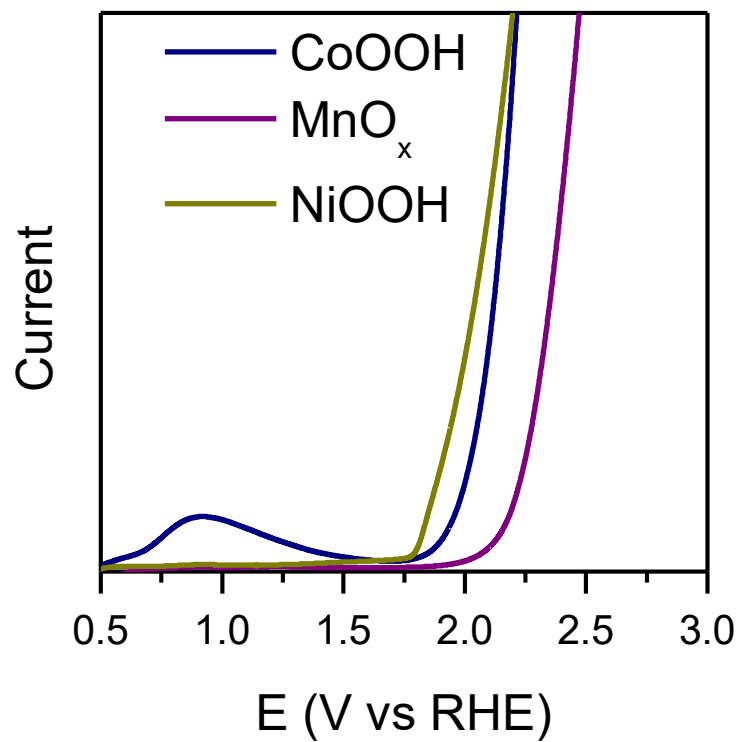

**Supplementary Figure 25.** OER activity of CoOOH, MnO<sub>x</sub>, and NiOOH measured in KPi electrolyte (pH=7.1) at a scanning rate of 5 mV/s.

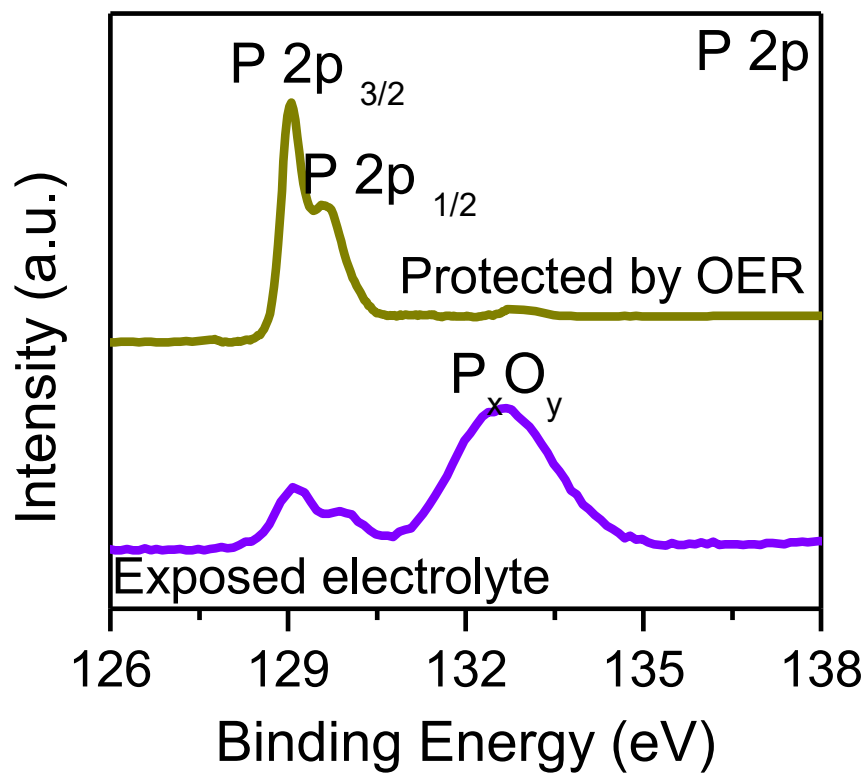

**Supplementary Figure 26.** P2p XPS spectrum of BP/BiVO<sub>4</sub> and NiOOH/BP/BiVO<sub>4</sub> photoanodes after long time testing. A raised P<sub>x</sub>O<sub>y</sub> peak can be clearly observed when the BP was directly exposed in the electrolyte, indicating considerable oxidation degree of BP during photoelectrochemical water splitting.

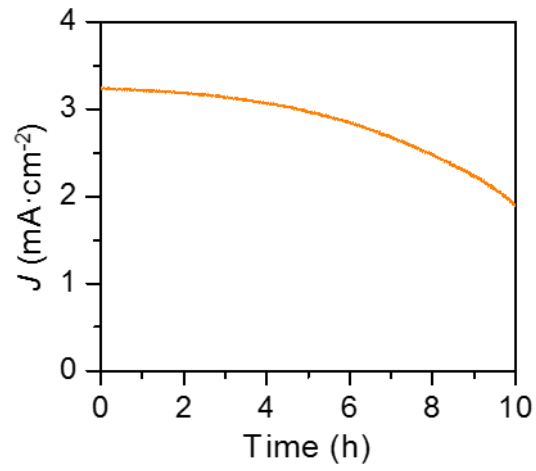

**Supplementary Figure 27.** Photocurrent density stability of  $\text{CoOOH}/\text{BP}/\text{BiVO}_4$  photoanode measured at 1.23 V vs RHE in KPi electrolyte ( $\text{pH}=7.1$ ) under AM 1.5 illumination.

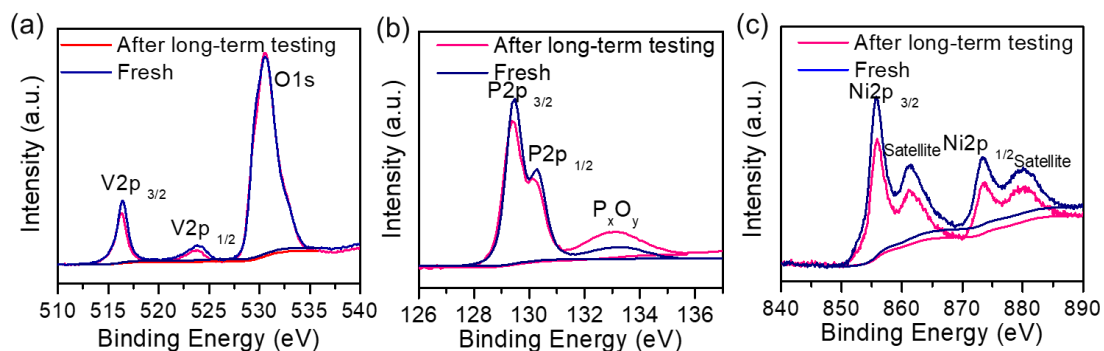

**Supplementary Figure 28.** Comparisons of XPS results of NiOOH/BP/BiVO<sub>4</sub> before and after long-term testing. (a) V 2p and O1s, (b) P2p and (c) Ni2p.

In Figure S28a, the O1s peak shows on detectable changes in intensity and position, whereas a slight shift of the V 2p towards lower binding energy and reduced intensity can be observed after long-term testing. The phenomenon can be tracked to the photo-charging of BiVO<sub>4</sub>, by which the V in 5+ state was somehow reduced to 4+ state<sup>3,4</sup>. Figure S28b shows the P 2p peak before and after long-term testing. It is a fact that BP is able to be slowly oxidized during PEC testing, as evidenced by the raised P<sub>x</sub>O<sub>y</sub> peak. Nevertheless, the Ni 2p peaks were determined to be stable during PEC testing (Figure S28c). Overall, the BP/BiVO<sub>4</sub> protected by NiOOH layer can be relatively stable for at least 60 hours.

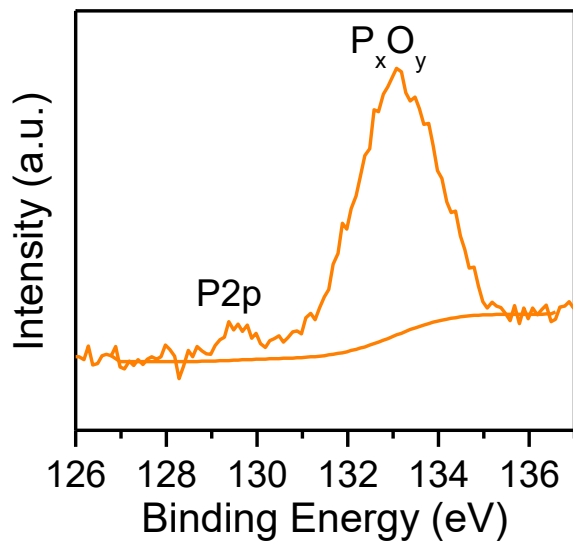

**Supplementary Figure 29.** P2p XPS spectrum of CoOOH/BP/BiVO<sub>4</sub> before and after long-term testing.

**Supplementary Table 1.** Fitting results of Nyquist plots.

| Samples                       | R1 ( $\Omega$ ) | R2 ( $\Omega$ ) | R3 ( $\Omega$ ) | C <sub>bulk</sub> ( $\mu\text{F cm}^{-2}$ ) | C <sub>trap</sub> ( $\mu\text{F cm}^{-2}$ ) |
|-------------------------------|-----------------|-----------------|-----------------|---------------------------------------------|---------------------------------------------|
| BiVO <sub>4</sub>             | 11.6            | 3200            |                 | 35.2                                        | 29.7                                        |
| BP/BiVO <sub>4</sub>          | 12.4            | 1084            |                 | 32.9                                        | 328.9                                       |
| NiOOH/FeOOH/BiVO <sub>4</sub> | 10.3            | 204             | 1412            | 30.2                                        | 132                                         |
| NiOOH/BP/BiVO <sub>4</sub>    | 10.2            | 162             | 1416            | 32.2                                        | 567.5                                       |

**Supplementary Table 2.** Photocurrent density at 1.23 V vs RHE and enhancement factors.

| Samples                                | J (mA/cm <sup>2</sup> ) | Enhancement factors<br>(with BP/without BP) |
|----------------------------------------|-------------------------|---------------------------------------------|
| NiOOH/BiVO <sub>4</sub>                | 3.03                    | 1.48                                        |
| NiOOH/BP/BiVO <sub>4</sub>             | 4.48                    |                                             |
| CoOOH/BiVO <sub>4</sub>                | 2.23                    | 1.51                                        |
| CoOOH/BP/BiVO <sub>4</sub>             | 3.37                    |                                             |
| MnO <sub>x</sub> /BiVO <sub>4</sub>    | 1.85                    | 1.74                                        |
| MnO <sub>x</sub> /BP/BiVO <sub>4</sub> | 3.22                    |                                             |



**Supplementary Table 3.** Recent progress on PEC performance of various OEC/BiVO<sub>4</sub>

photoanodes.

| Category                          | Photoanode                        | OEC                                             | Photocurrent density<br>(mA/cm <sup>2</sup> @ 1.23 V<br>vs RHE) | Ref |
|-----------------------------------|-----------------------------------|-------------------------------------------------|-----------------------------------------------------------------|-----|
| Pristine<br>OEC/BiVO <sub>4</sub> | BiVO <sub>4</sub>                 | Co-pi                                           | 3.6                                                             | S4  |
|                                   | BiVO <sub>4</sub>                 | FeOOH                                           | ~2.0                                                            | S5  |
|                                   | BiVO <sub>4</sub>                 | CoOOH                                           | 4.0                                                             | S6  |
|                                   | BiVO <sub>4</sub>                 | Ni-Bi                                           | 1.8                                                             | S7  |
|                                   | BiVO <sub>4</sub>                 | Co <sub>3</sub> O <sub>4</sub>                  | 2.71                                                            | S8  |
|                                   | BiVO <sub>4</sub>                 | Co-Bi                                           | 3.2                                                             | S9  |
|                                   | BiVO <sub>4</sub>                 | Fe-Ni LDH                                       | 1.21                                                            | S10 |
|                                   | BiVO <sub>4</sub>                 | NiB                                             | 3.47                                                            | S11 |
|                                   | BiVO <sub>4</sub>                 | Co-La LDH                                       | ~2.0                                                            | S12 |
|                                   | BiVO <sub>4</sub>                 | NiOOH/FeOOH                                     | 4.8                                                             | S13 |
|                                   | BiVO <sub>4</sub>                 | CoFe(OH) <sub>x</sub>                           | 2.48                                                            | S14 |
|                                   | BiVO <sub>4</sub>                 | NiFe <sub>x</sub> -Bi                           | ~4                                                              | S15 |
|                                   | BiVO <sub>4</sub>                 | Molecular Co <sub>4</sub> O <sub>4</sub> Cubane | ~5                                                              | S16 |
|                                   | Modified<br>OEC/BiVO <sub>4</sub> | N doped BiVO <sub>4</sub>                       | NiOOH/FeOOH                                                     | ~5  |
| BiVO <sub>4</sub>                 |                                   | p-NiO/CoO <sub>x</sub>                          | 3.5                                                             | S18 |
| BiVO <sub>4</sub>                 |                                   | Oxygen defect FeOOH                             | 4.3                                                             | S19 |
| BiVO <sub>4</sub>                 |                                   | In <sub>2</sub> O <sub>3</sub> thin layer/CoOOH | 3.4                                                             | S20 |
| BiVO <sub>4</sub>                 |                                   | TiO <sub>2</sub> thin layer/Ir-COOH             | ~2.7                                                            | S21 |

|  |                   |          |      |          |
|--|-------------------|----------|------|----------|
|  | BiVO <sub>4</sub> | BP/NiOOH | 4.48 | Our work |
|--|-------------------|----------|------|----------|

### Supplementary References

1. Li, L. et. al. Black phosphorus field-effect transistors. *Nat. Nanotech.* **9**, 372 (2014).
2. Kang, J. et. al. Stable aqueous dispersions of optically and electronically active phosphorene. *Proc. Natl. Acad. Sci.* **113**, 11688–11693 (2016).
3. Trzeźniewski, B. et. al. Near-complete suppression of surface losses and total internal quantum efficiency in BiVO<sub>4</sub> photoanodes. *Energy Environ. Sci.* **10**, 1517–1529 (2017).
4. Trzeźniewski, B. & Smith, W. Photocharged BiVO<sub>4</sub> photoanodes for improved solar water splitting. *J. Mater. Chem. A* **4**, 2919–2926 (2016)
5. Abdi, F. F. & van de Krol, R. Nature and light dependence of bulk recombination in Co-Pi-catalyzed BiVO<sub>4</sub> photoanodes. *J. Phys. Chem. C* **116**, 9398–9404 (2012).
6. Seabold, J. A. & Choi, K.S. Efficient and stable photo-oxidation of water by a bismuth vanadate photoanode coupled with an iron oxyhydroxide oxygen evolution catalyst. *J. Am. Chem. Soc.* **134**, 2186–2192 (2012).
7. Tang, F. Cheng, W. Su, H. Zhao, X. & Liu, Q. Smoothing surface trapping states in 3D coral-like CoOOH-wrapped-BiVO<sub>4</sub> for efficient photoelectrochemical water oxidation. *ACS Appl. Mater. Interfaces* **10**, 6228–6234 (2018).
8. Choi, S. K. Choi, W. & Park, H. Solar water oxidation using nickel-borate coupled BiVO<sub>4</sub> photoelectrodes. *Phys. Chem. Chem. Phys.* **15**, 6499–6507 (2013).
9. Chang, X. Wang, T. Zhang, P. Zhang, J. Li, A. & Gong, J. Enhanced surface reaction kinetics and charge separation of p-n heterojunction Co<sub>3</sub>O<sub>4</sub>/BiVO<sub>4</sub>

- photoanodes. *J. Am. Chem. Soc.* **137**, 8356–8359 (2015).
10. Wang, S. Chen, P. Yun, J. H. Hu, Y. & Wang, L. An electrochemically treated BiVO<sub>4</sub> photoanode for efficient photoelectrochemical water splitting. *Angew. Chem. Int. Ed.* **56**, 8500–8504 (2017).
  11. Zhu, Y. et. al. Interface engineering of 3D BiVO<sub>4</sub>/Fe-based layered double hydroxide core/shell nanostructures for boosting photoelectrochemical water oxidation. *J. Mater. Chem. A* **5**, 9952–9959 (2017).
  12. Dang, K. Chang, X. Wang, T. & Gong, J. Enhancement of photoelectrochemical oxidation by an amorphous nickel boride catalyst on porous BiVO<sub>4</sub>. *Nanoscale* **9**, 16133–16137 (2017).
  13. Chhetri, M. Dey, S. & Rao, C. N. R. Photoelectrochemical oxygen evolution reaction activity of amorphous Co-La double hydroxide-BiVO<sub>4</sub> fabricated by pulse plating electrodeposition. *ACS Energy Lett.* **2**, 1062–1069 (2017).
  14. Kim, T. W. & Choi, K. S. Nanoporous BiVO<sub>4</sub> photoanodes with dual-layer oxygen evolution catalysts for solar water splitting. *Science* **343**, 990–994 (2014).
  15. Liu, W. Liu, H. Dang, L. Zhang, H. Wu, X. Yang, B. Li, Z. Zhang, X. Lei, L. & Jin, S. Amorphous cobalt-iron hydroxide nanosheet electrocatalyst for efficient electrochemical and photo-electrochemical oxygen evolution. *Adv. Funct. Mater.* **27**, 1603904 (2017).
  16. Kuang, Y. Jia, Q. Nishiyama, H. Yamada, T. Kudo, A. & Domen, K. A front-illuminated nanostructured transparent BiVO<sub>4</sub> photoanode for >2% efficient water splitting. *Adv. Energy Mater.* **6**, 1501645 (2016).
  17. Wang, Y. et. al. Highly efficient photoelectrochemical water splitting with an

- immobilized molecular  $\text{Co}_4\text{O}_4$  cubane catalyst. *Angew. Chem. Int. Ed.* **56**, 6911–6915 (2017).
18. Kim, T. W. Ping, Y. Galli, G. A. & Choi, K. S. Simultaneous enhancements in photon absorption and charge transport of bismuth vanadate photoanodes for solar water splitting. *Nat. Commun.* **6**, 8769 (2015).
  19. Zhong, M. et. al. Surface modification of  $\text{CoO}_x$  loaded  $\text{BiVO}_4$  photoanodes with ultrathin p-type NiO layers for improved solar water oxidation. *J. Am. Chem. Soc.* **137**, 5053–5060 (2015).
  20. Zhang, B. Wang, L. Zhang, Y. Ding, Y. & Bi, Y. Ultrathin  $\text{FeOOH}$  nanolayers with abundant oxygen vacancies on  $\text{BiVO}_4$  photoanodes for efficient water oxidation. *Angew. Chem. Int. Ed.* **57**, 2248–2252 (2018).
  21. Qiu, W. Huang, Y. Tang, S. Ji, H. & Tong, Y. thin-layer indium oxide and cobalt oxyhydroxide cobalt-modified  $\text{BiVO}_4$  photoanode for solar-assisted water electrolysis. *J. Phys. Chem. C.* **121**, 17150–17159 (2017).
  22. Kan, M. et. al. A highly efficient nanoporous  $\text{BiVO}_4$  photoelectrode with enhanced interface charge transfer Co-catalyzed by molecular catalyst. *Applied Catalyst. B: Environ.* **225**, 504–511 (2018).
